# Supplementary material
Source: PubMed Central journal article supplement (PMC10524549)
Supplement: NIHMS1904763-supplement-supinfo.pdf [file NIHMS1904763-supplement-supinfo.pdf]

## Supplementary Appendix

1. Unadjusted and adjusted percent change in activity participation by race and ethnicity from before COVID-19 pandemic (2015-2019) and after start of pandemic (2020) <sup>a</sup>, with covariates added separately in a series of models

|                                                                 | <b>Total<br/>Sample<br/>n=6,815</b> | <b>American<br/>Indian<br/>n=127</b> | <b>Asian<br/>n=75</b> | <b>Black,<br/>non-<br/>Hispanic<br/>n=1,470</b> | <b>Hispanic<br/>n=359</b> | <b>Other<br/>n=65</b> | <b>White,<br/>non-<br/>Hispanic<br/>n=4,719</b> | <b>p-value<br/>for inter-<br/>action<br/>term <sup>c</sup></b> |
|-----------------------------------------------------------------|-------------------------------------|--------------------------------------|-----------------------|-------------------------------------------------|---------------------------|-----------------------|-------------------------------------------------|----------------------------------------------------------------|
| <b>Visiting friends or family</b>                               | <b>Percent change</b>               |                                      |                       |                                                 |                           |                       |                                                 |                                                                |
| Unadjusted                                                      | -21.5%                              | -20.3%                               | -26.6%                | -29.6%                                          | -29.4%                    | -28.2%                | -20.0%                                          | 0.7473                                                         |
| Age/sex adjusted                                                | -19.1%                              | -18.4%                               | -23.5%                | -29.6%                                          | -30.9%                    | -26.3%                | -17.7%                                          | 0.7763                                                         |
| Age/sex/functional status adjusted                              | -19.2%                              | -17.9%                               | -24.3%                | -26.7%                                          | -26.9%                    | -24.8%                | -18.2%                                          | 0.7713                                                         |
| Age/sex/income adjusted                                         | -19.9%                              | -18.1%                               | -23.8%                | -26.5%                                          | -26.5%                    | -24.6%                | -19.3%                                          | 0.7956                                                         |
| Age/gender/region adjusted                                      | -19.1%                              | -17.7%                               | -26.7%                | -26.0%                                          | -22.8%                    | -17.8%                | -25.7%                                          | 0.7590                                                         |
| Age/sex/anxiety-depression adjusted                             | -18.9%                              | -18.2%                               | -22.3%                | -26.8%                                          | -26.8%                    | -24.8%                | -17.9%                                          | 0.7824                                                         |
| Age/sex/transportation problems adjusted                        | -19.4%                              | -18.4%                               | -23.2%                | -27.2%                                          | -27.2%                    | -24.3%                | -18.3%                                          | 0.7834                                                         |
| All variables adjusted <sup>b</sup>                             | -19.9%                              | -19.0%                               | -26.5%                | -25.2%                                          | -21.5%                    | -17.1%                | -23.3%                                          | 0.7649                                                         |
| <b>Attending religious services</b>                             | <b>Percent change</b>               |                                      |                       |                                                 |                           |                       |                                                 |                                                                |
| Unadjusted                                                      | -23.2%                              | -23.2%                               | -15.3%                | -34.3%                                          | -27.8%                    | -24.6%                | -21.9%                                          | 0.0056                                                         |
| Age/sex adjusted                                                | -22.2%                              | -21.9%                               | -14.9%                | -32.5%                                          | -26.7%                    | -25.6%                | -21.1%                                          | 0.0047                                                         |
| Age/sex/functional status adjusted                              | -22.6%                              | -22.8%                               | -16.4%                | -32.0%                                          | -26.9%                    | -24.7%                | -21.7%                                          | 0.0121                                                         |
| Age/sex/income adjusted                                         | -22.4%                              | -22.8%                               | -16.3%                | -32.1%                                          | -27.8%                    | -24.4%                | -21.4%                                          | 0.0107                                                         |
| Age/gender/region adjusted                                      | -21.7%                              | -20.8%                               | -30.4%                | -26.9%                                          | -16.8%                    | -22.1%                | -27.7%                                          | 0.0046                                                         |
| Age/sex/anxiety-depression adjusted                             | -22.3%                              | -22.6%                               | -15.4%                | -32.2%                                          | -27.0%                    | -23.4%                | -21.4%                                          | 0.0085                                                         |
| Age/sex/transportation problems adjusted                        | -22.4%                              | -22.0%                               | -15.8%                | -32.5%                                          | -27.0%                    | -23.4%                | -21.4%                                          | 0.0073                                                         |
| All variables adjusted <sup>a</sup>                             | -22.3%                              | -21.1%                               | -31.0%                | -28.2%                                          | -16.7%                    | -22.9%                | -28.9%                                          | 0.0018                                                         |
| <b>Participating in clubs, classes, or organized activities</b> | <b>Percent change</b>               |                                      |                       |                                                 |                           |                       |                                                 |                                                                |
| Unadjusted                                                      | -20.9%                              | -19.5%                               | -15.6%                | -18.4%                                          | -12.4%                    | -14.1%                | -22.0%                                          | 0.9841                                                         |
| Age/sex adjusted                                                | -20.1%                              | -18.5%                               | -14.6%                | -18.4%                                          | -11.6%                    | -13.3%                | -21.3%                                          | 0.9837                                                         |
| Age/sex/functional status adjusted                              | -20.5%                              | -19.6%                               | -15.7%                | -17.4%                                          | -12.1%                    | -14.3%                | -22.0%                                          | 0.9831                                                         |
| Age/sex/income adjusted                                         | -21.8%                              | -22.1%                               | -17.3%                | -17.8%                                          | -14.2%                    | -15.8%                | -23.1%                                          | 0.9861                                                         |
| Age/gender/region adjusted                                      | -20.3%                              | -21.2%                               | -17.5%                | -11.8%                                          | -14.5%                    | -18.5%                | -13.3%                                          | 0.9841                                                         |
| Age/sex/anxiety-depression adjusted                             | -20.4%                              | -20.1%                               | -15.7%                | -20.4%                                          | -12.0%                    | -13.9%                | -22.0%                                          | 0.9750                                                         |
| Age/sex/transportation problems adjusted                        | -20.3%                              | -19.4%                               | -15.8%                | -18.0%                                          | -12.1%                    | -14.1%                | -21.8%                                          | 0.9857                                                         |
| All variables adjusted <sup>a</sup>                             | -22.1%                              | -22.9%                               | -20.9%                | -14.6%                                          | -16.5%                    | -22.6%                | -15.3%                                          | 0.9764                                                         |
| <b>Going out for enjoyment</b>                                  | <b>Percent change</b>               |                                      |                       |                                                 |                           |                       |                                                 |                                                                |
| Unadjusted                                                      | -49.0%                              | -28.6%                               | -56.6%                | -47.7%                                          | -39.8%                    | -37.1%                | -50.3%                                          | 0.0003                                                         |
| Age/sex adjusted                                                | -45.9%                              | -25.4%                               | -52.8%                | -45.2%                                          | -37.8%                    | -33.5%                | -47.1%                                          | 0.0003                                                         |
| Age/sex/functional status adjusted                              | -46.6%                              | -25.3%                               | -53.1%                | -45.3%                                          | -39.4%                    | -35.6%                | -47.6%                                          | 0.0004                                                         |
| Age/sex/income adjusted                                         | -47.5%                              | -25.8%                               | -52.3%                | -46.8%                                          | -42.1%                    | -36.1%                | -48.6%                                          | 0.0011                                                         |

|                                          |        |        |        |        |        |        |        |        |
|------------------------------------------|--------|--------|--------|--------|--------|--------|--------|--------|
| Age/gender/region adjusted               | -45.9% | -47.2% | -45.3% | -38.0% | -52.9% | -25.3% | -33.5% | 0.0003 |
| Age/sex/anxiety-depression adjusted      | -46.1% | -26.8% | -52.3% | -44.6% | -38.8% | -33.7% | -46.9% | 0.0027 |
| Age/sex/transportation problems adjusted | -46.2% | -25.5% | -52.3% | -44.4% | -38.2% | -33.6% | -47.0% | 0.0004 |
| All variables adjusted <sup>a</sup>      | -47.8% | -49.3% | -48.3% | -44.0% | -57.1% | -26.6% | -35.7% | 0.0019 |

<sup>a</sup> We used the predictive margins method to determine average predicted probability for each activity. We constructed multivariate mixed-effects logistic regression models for each activity with the interaction term and adjusted for covariates that potentially mediate meaningful activity engagement in a series of models. Then, we generated and averaged predicted probability of each activity pre-pandemic and after start of pandemic using the fitted model from the entire dataset; <sup>b</sup> All variables include age; sex; functional status, a derived continuous variable to total number of activities of daily living that the NHATS participants receives help; income; geographic region; anxiety-depression; and transportation problems. <sup>c</sup> Interaction was examined between onset of COVID-19 pandemic (indicator for pre-pandemic 2015-2019 vs. after start of pandemic 2020) and self-reported race/ethnicity
